# Supplementary material for: A novel cell membrane-cloaked magnetic nanogripper with enhanced stability for drug discovery
Source: Royal Society of Chemistry journal article supplement (doi:10.1039/c9bm01411j), 2019-11-12
Supplement: c9bm01411j1.pdf [file c9bm01411j1.pdf]

## Supporting Information

### **A novel cell membrane-cloaked magnetic nanogripper with enhanced stability for drug discovery**

Yusi Bu, <sup>a,b</sup> Qi Hu, <sup>a,b</sup> Xiaolin Zhang, <sup>a,b</sup> Ting Li, <sup>a,b</sup> Xiaoyu Xie, \* <sup>a,b</sup> and Sicen Wang  
\* <sup>a,b</sup>

<sup>a</sup>*School of Pharmacy, Health Science Center, Xi'an Jiaotong University, Xi'an 710061, China*

<sup>b</sup>*Shaanxi Engineering Research Center of Cardiovascular Drugs Screening & Analysis, Xi'an 710061, China*

### **Corresponding Authors**

\*Tel.: +86 29 82656788. E-mail: xiexiaoyu@xjtu.edu.cn (X. Xie).

\*Tel.: +86 29 82656788. E-mail: wangsc@mail.xjtu.edu.cn (S. Wang).

**Samples preparation for TEM:**

1. Use 300 mesh carbon coated grids.
2. Prepare  $\alpha_{1A}$ /MNGs solution and ultrasonic dispersed evenly.
3. Place a drop (approx. 20  $\mu$ L) of  $\alpha_{1A}$ /MNGs solution on the grid.
4. Dry overnight in a Petri dish and view the next day in TEM.

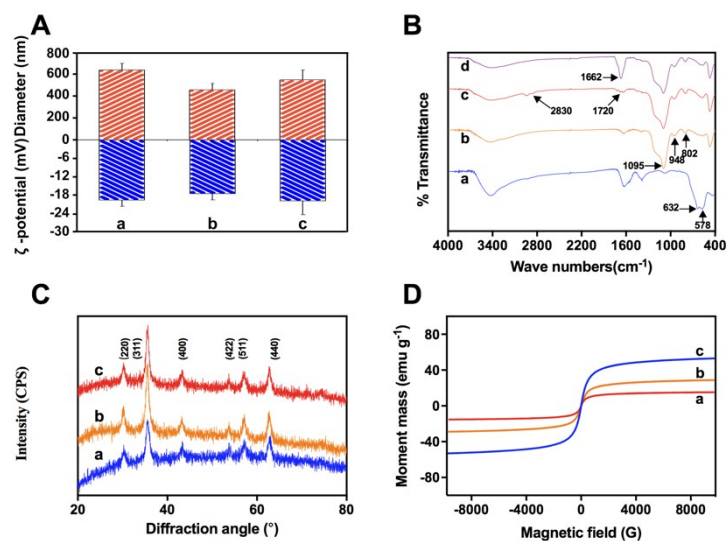

**Figure S1.** Size and zeta potential results of high  $\alpha_{1A}$ -AR expression HEK293 cell membrane-derived vesicles (a), Fe<sub>3</sub>O<sub>4</sub>-CHO nanoparticles (b) and  $\alpha_{1A}$ /MNGs (c) (A); FT-IR spectra of Fe<sub>3</sub>O<sub>4</sub> (a), Fe<sub>3</sub>O<sub>4</sub>-SiO<sub>2</sub> (b), Fe<sub>3</sub>O<sub>4</sub>-CHO (c) and  $\alpha_{1A}$ /MNGs (d) (B); XRD patterns of Fe<sub>3</sub>O<sub>4</sub> (a), Fe<sub>3</sub>O<sub>4</sub>-CHO (b) and  $\alpha_{1A}$ /MNGs (c) (C) and VSM curves of  $\alpha_{1A}$ /MNGs (a), Fe<sub>3</sub>O<sub>4</sub>-CHO (b) and Fe<sub>3</sub>O<sub>4</sub> (c) (D).

**A**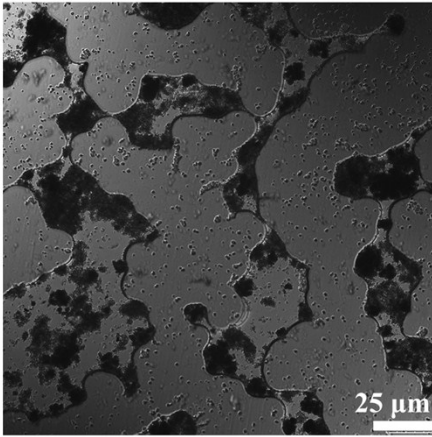**B**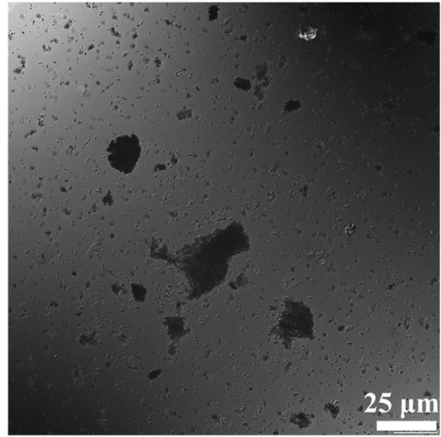

**Figure S2.** Bright-field images of confocal microscopy images of MNGs cores (A) and  $\alpha$ 1A/MNGs (B).

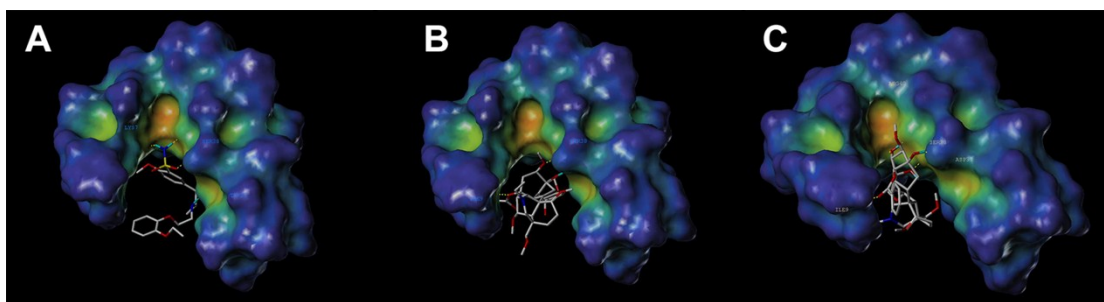

**Figure S3.** The binding model of compounds tamsulosin (A), bulleyaconitine A (B) and benzoylhypacoitine (C) with  $\alpha_{1A}$  AR (PDB ID: 4iye).
